# Supplementary figures and images for: Mutational Studies on Resurrected Ancestral Proteins Reveal Conservation of Site-Specific Amino Acid Preferences throughout Evolutionary History
Source: PubMed Central journal article supplement — Mol Biol Evol. 2014 Nov 12;32(2):440–55. doi: 10.1093/molbev/msu312 (PMC4298172; doi:10.1093/molbev/msu312), 2014-11-12

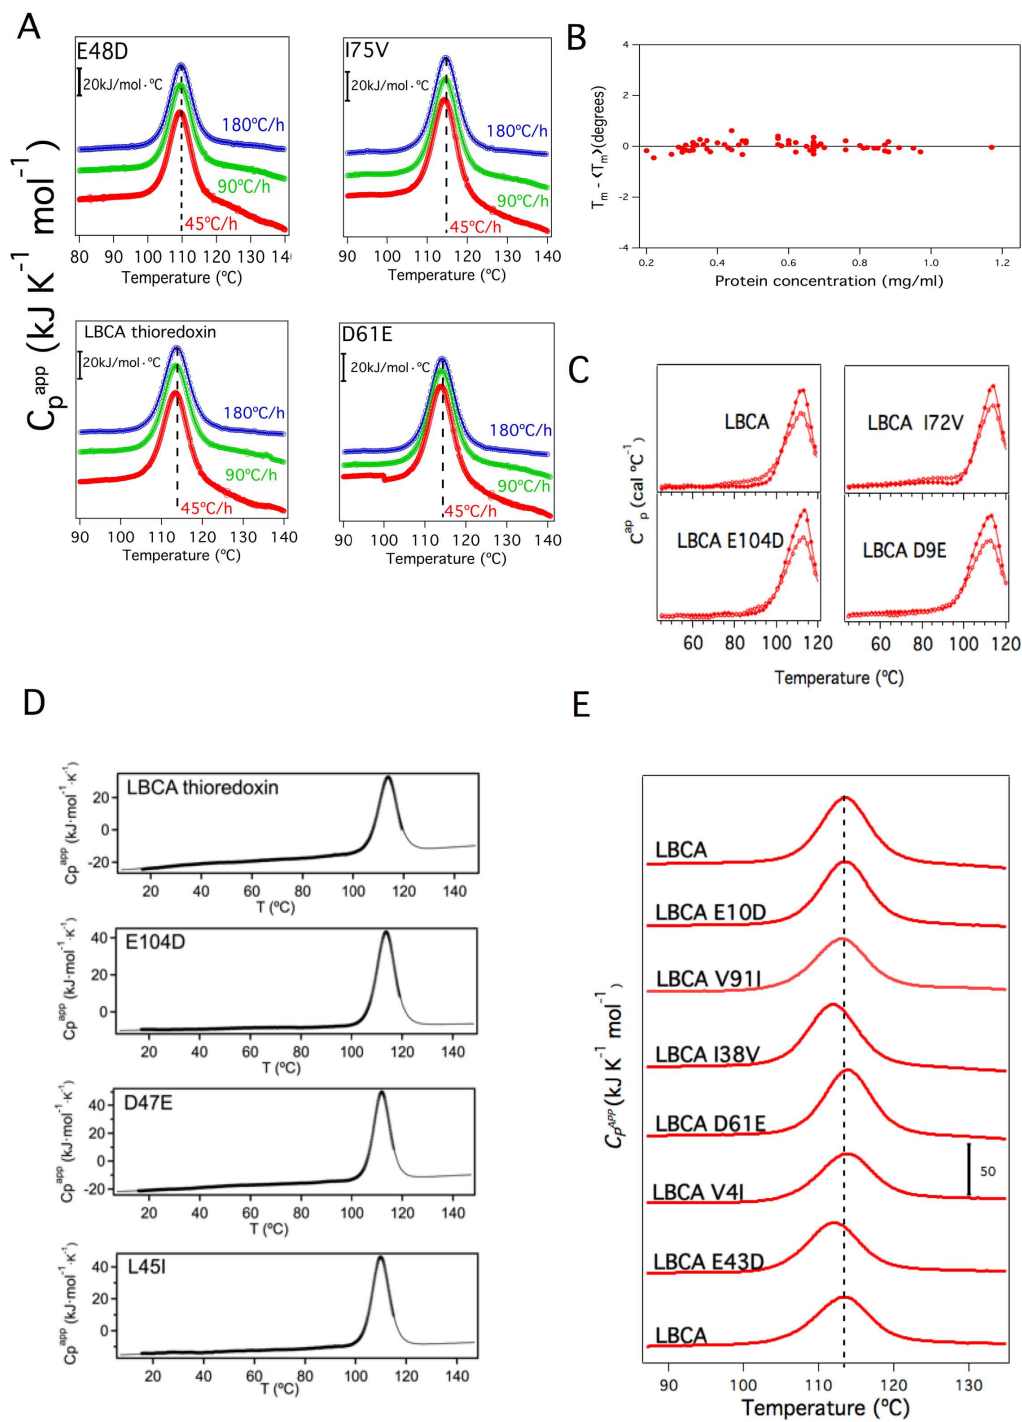

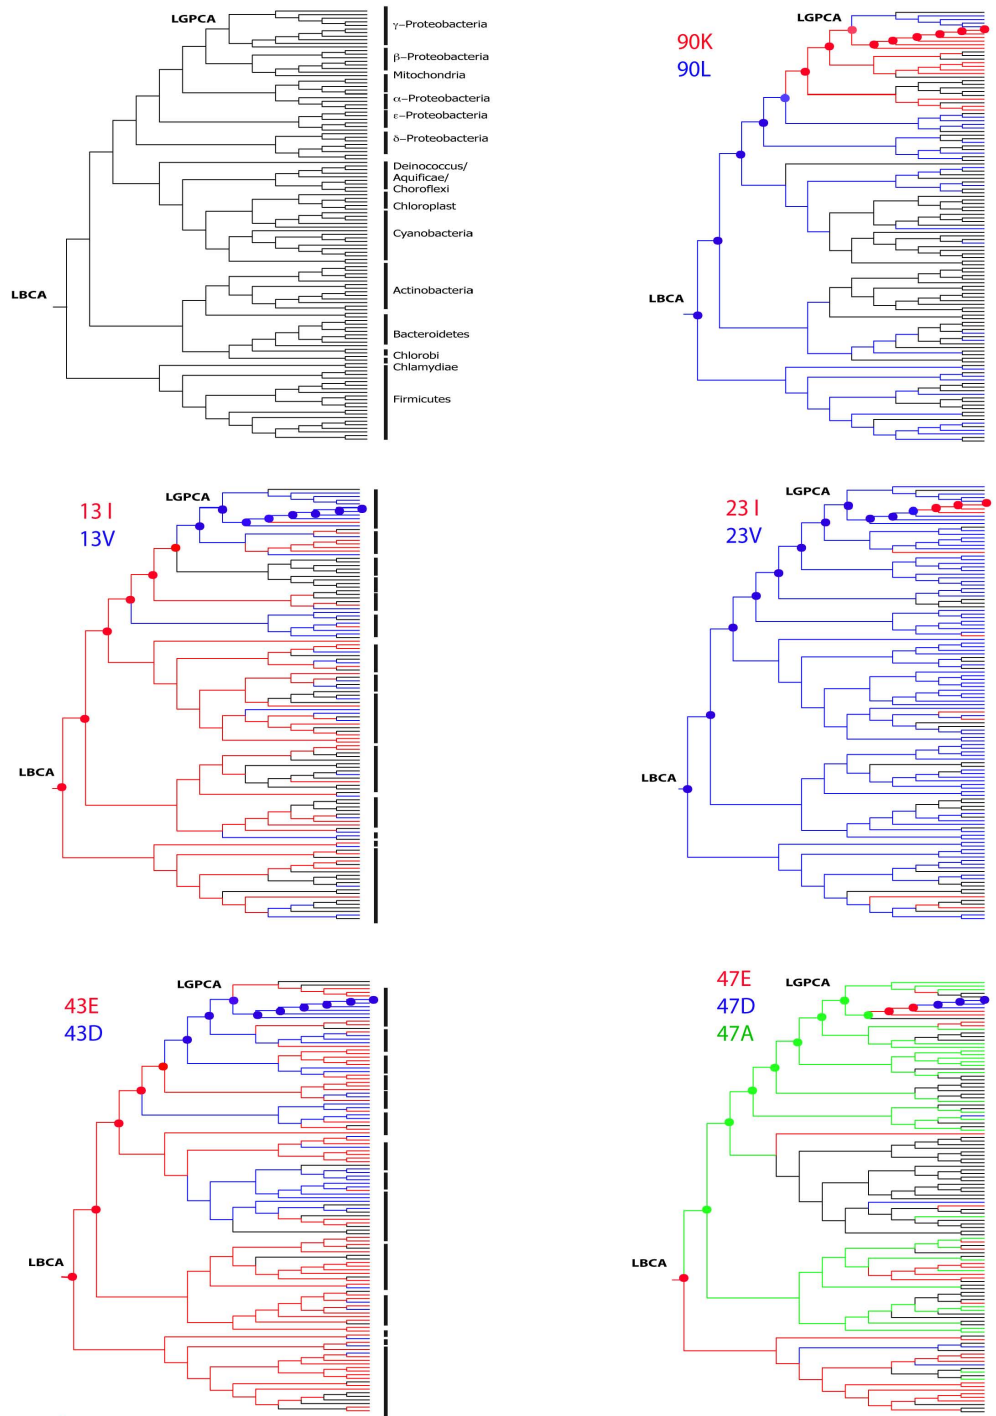

Figure S2

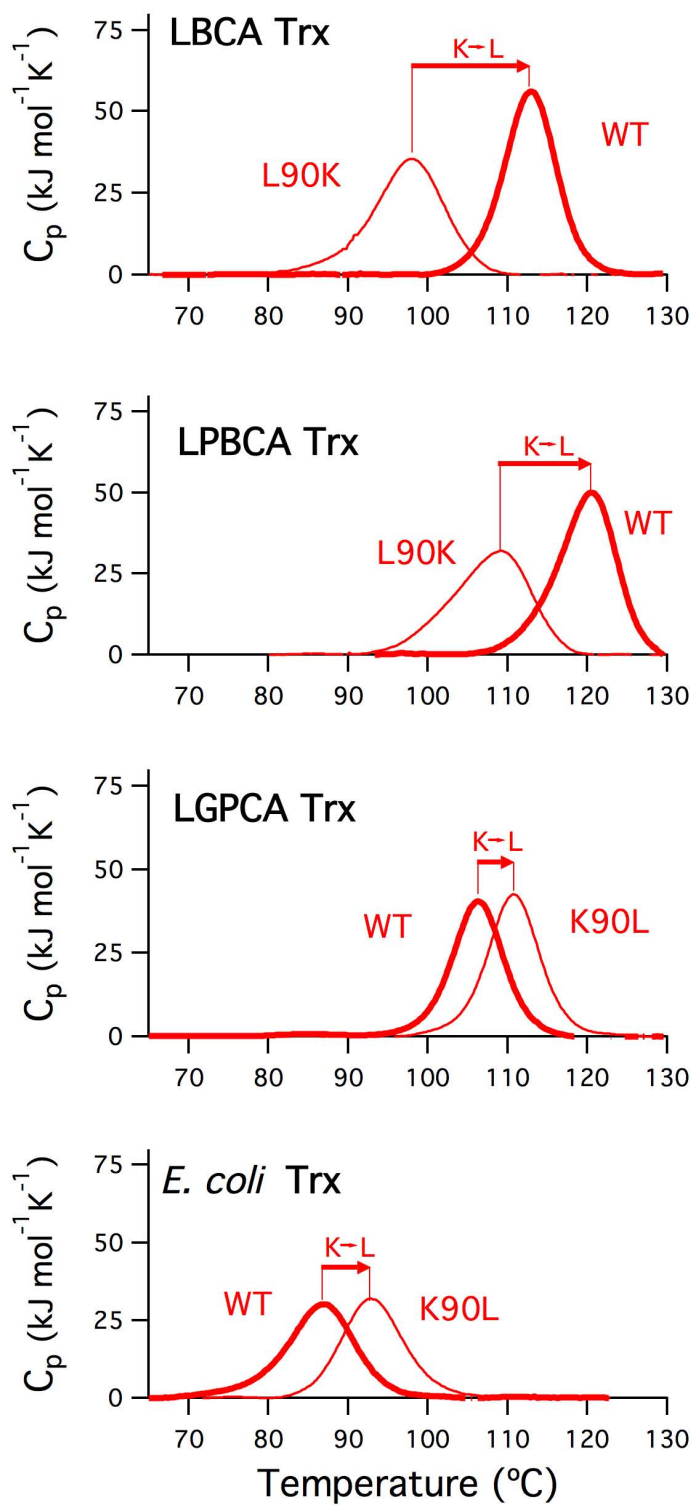

Figure S3

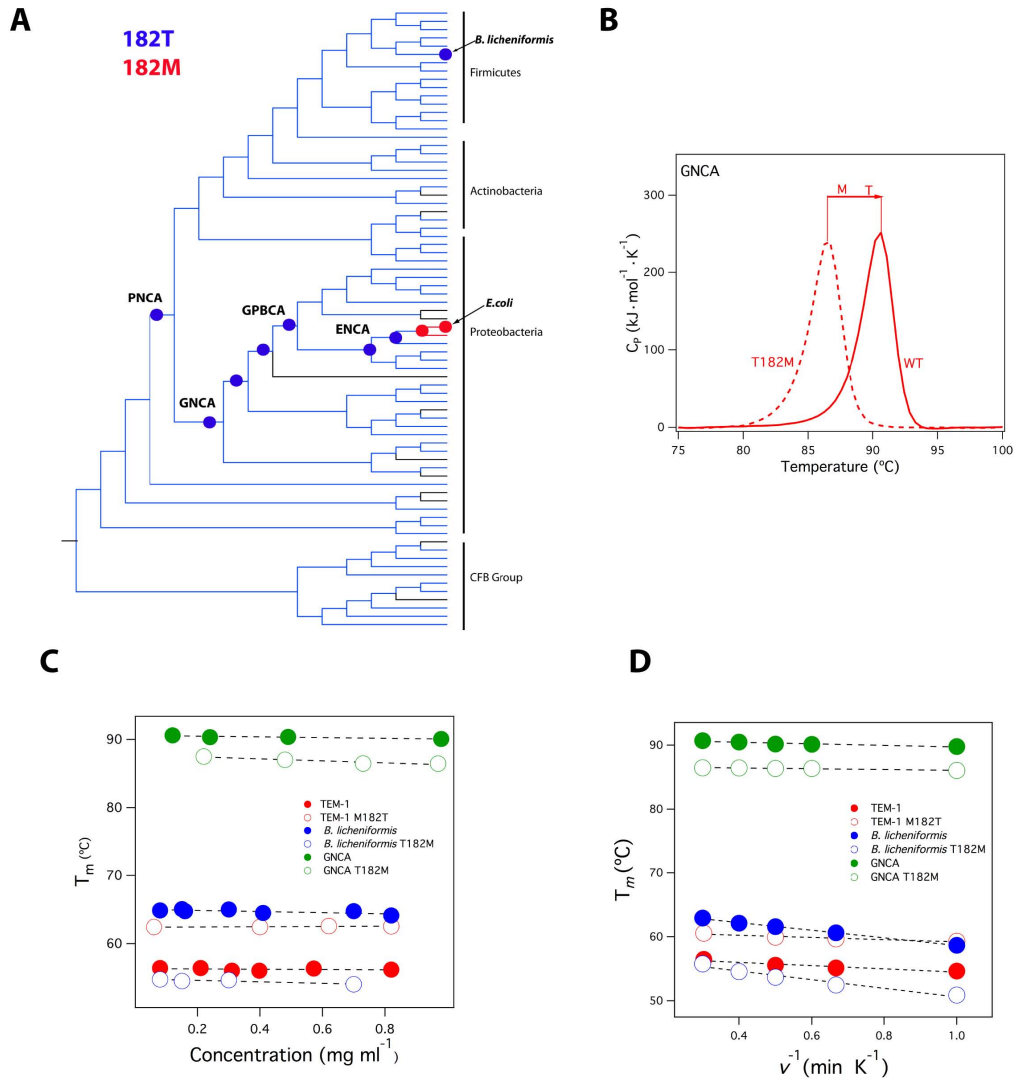

Figure S4

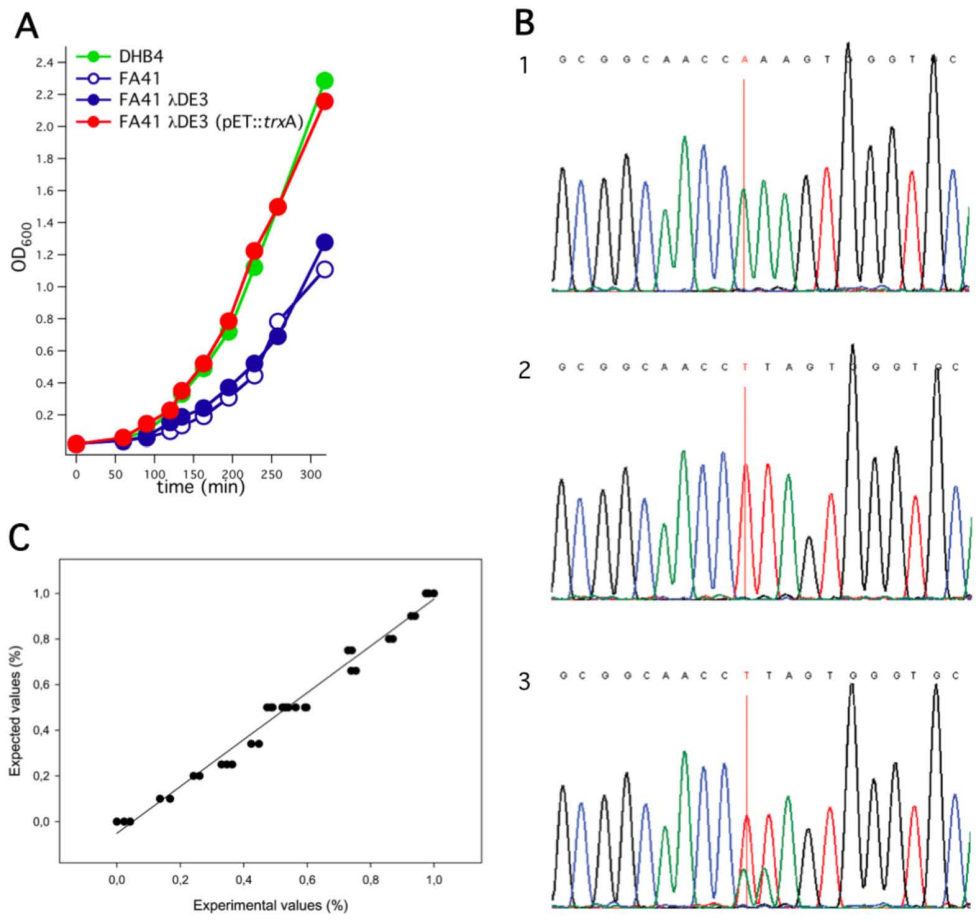

Figure S5

Supplement: supp_msu312_supplementary_material_figures.pdf [file supp_msu312_supplementary_material_figures.pdf]
